# Supplementary material for: Effect of Y doping on high-pressure behavior of Ag2S nanocrystals
Source: Royal Society of Chemistry journal article supplement (doi:10.1039/c7ra05327d), 2017-01-01
Supplement: c7ra05327d1.pdf [file c7ra05327d1.pdf]

# Y doping effect on high-pressure behavior in Ag<sub>2</sub>S nanocrystals

Pan Wang<sup>a,b</sup>, Rui Zhao<sup>c</sup>, Lixin Wu<sup>b</sup> and Mingzhe Zhang<sup>\*a</sup>

<sup>a</sup>State Key Laboratory of Superhard Materials, Jilin University, Changchun 130012, China

<sup>b</sup>State Key Laboratory of Supemolecular Structure and Materials, Jilin University, Changchun 130012, China

<sup>c</sup>College of Computer, Jilin Normal University, Siping 136000, China

\*Corresponding Author, E-mail: [zhangmz@jlu.edu.cn](mailto:zhangmz@jlu.edu.cn)

## 1. XPS analysis of monoclinic Ag<sub>2</sub>S:Y nanocrystals

For Y doped Ag<sub>2</sub>S nanocrystals, it is obviously seen that no other impurities are detectable in the full X-ray photoelectron spectroscopy (XPS) spectra of Fig. S1c. There is some overlap in Figure S1a, due to the close binding energies of Y and S elements. The S 2p<sub>3/2</sub> and S 2p<sub>1/2</sub> peaks (Fig. S1a) at 161.6 and 162.7 eV manifest that the S is in S<sup>2-</sup> state.<sup>1</sup> The peak (Fig. S1a) of Y 3d<sub>5/2</sub> at 158.5 eV manifests that Y is in Y<sup>3+</sup> state,<sup>2</sup> excluding the possibility of Y metal clusters. The Ag 3d<sub>5/2</sub> and Ag 3d<sub>3/2</sub> peaks (Fig. S1b) at 368.8 and 374.7 eV suggest that Ag is in Ag<sup>+</sup> state, in agreement with the reported value of Ag<sub>2</sub>S.<sup>3</sup> As we can see from Table S1 of XPS analysis, Y content is about 0.41 atom% in the monoclinic Ag<sub>2</sub>S:Y samples.

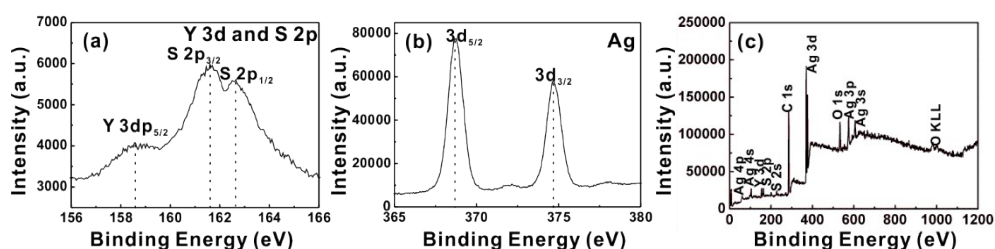

**Fig. S1** XPS spectra of (a-c) the monoclinic Ag<sub>2</sub>S:Y nanocrystals at ambient conditions. (a)

Binding energy of Y 3d and S 2p regions; (b) binding energies of Ag 3d regions; (c) full scan spectra, respectively.

**Table S1.** Element content percentage of the monoclinic Ag<sub>2</sub>S:Y nanocrystals at ambient conditions.

| Element | Weight (%) | Atom (%) |
|---------|------------|----------|
| S       | 12.36      | 32.15    |
| Y       | 0.43       | 0.41     |
| Ag      | 87.21      | 67.44    |
| Total   | 100.00     | 100.00   |

## 2. Representative Rietveld refinement results

Representative Rietveld refinement results from Materials Studio and POWDERCELL softwares of the pure Ag<sub>2</sub>S and Ag<sub>2</sub>S:Y samples are displayed in Table S2 and S3, respectively. For Ag<sub>2</sub>S:Y samples, representative Rietveld refinement figures at several pressure points are shown in Fig. S2 to display the goodness of the Rietveld refinements.

**Table S2.** Representative Rietveld refinement results of the pure Ag<sub>2</sub>S nanocrystals from Materials Studio and POWDERCELL softwares.

| Phase | Pressure (GPa) | Space group | Cell parameter |       |       |             | Position parameter |       |       | Refinement agreement |                |                 |
|-------|----------------|-------------|----------------|-------|-------|-------------|--------------------|-------|-------|----------------------|----------------|-----------------|
|       |                |             | a (Å)          | b (Å) | c (Å) | $\beta$ (°) | Atom               | x     | y     | z                    | R <sub>p</sub> | R <sub>wp</sub> |
| I     | 0              | P21/n       | 4.220          | 6.916 | 7.853 | 99.651      | S                  | 0.354 | 0.254 | 0.121                | 0.076          | 0.093           |
|       |                |             | 0.001          | 0.002 | 0.003 | 0.023       | Ag1                | 0.771 | 0.010 | 0.318                |                |                 |
|       |                |             | uncertainty    |       |       |             | Ag2                | 0.288 | 0.311 | 0.444                |                |                 |
| I     | 0.93           | P21/n       | 4.176          | 6.780 | 7.843 | 99.585      | S                  | 0.351 | 0.221 | 0.139                | 0.092          | 0.135           |
|       |                |             | 0.001          | 0.001 | 0.002 | 0.019       | Ag1                | 0.751 | 0.029 | 0.324                |                |                 |
|       |                |             | uncertainty    |       |       |             | Ag2                | 0.258 | 0.299 | 0.457                |                |                 |
| I     | 6.83           | P21/n       | 4.097          | 6.481 | 7.672 | 98.550      | S                  | 0.315 | 0.213 | 0.134                | 0.087          | 0.128           |
|       |                |             | 0.001          | 0.001 | 0.003 | 0.025       | Ag1                | 0.739 | 0.009 | 0.870                |                |                 |
|       |                |             | uncertainty    |       |       |             | Ag2                | 0.241 | 0.326 | 0.442                |                |                 |

|     |       |                                               |                |                |                |                 |   |       |       |       |       |       |
|-----|-------|-----------------------------------------------|----------------|----------------|----------------|-----------------|---|-------|-------|-------|-------|-------|
| II  | 6.83  | P2 <sub>1</sub> 2 <sub>1</sub> 2 <sub>1</sub> | 6.625<br>0.002 | 4.170<br>0.001 | 7.220<br>0.001 | -               | S | 0.236 | 0.157 | 0.159 | 0.087 | 0.128 |
| II  | 9.30  | P2 <sub>1</sub> 2 <sub>1</sub> 2 <sub>1</sub> | 6.589<br>0.002 | 4.187<br>0.003 | 7.138<br>0.001 | -               | S | 0.236 | 0.133 | 0.154 | 0.079 | 0.095 |
| III | 9.30  | P21/n                                         | 4.191<br>0.001 | 5.830<br>0.003 | 7.982<br>0.001 | 94.819<br>0.034 | S | 0.200 | 0.249 | 0.094 | 0.079 | 0.095 |
| III | 18.20 | P21/n                                         | 4.135<br>0.002 | 5.672<br>0.003 | 7.931<br>0.001 | 93.580<br>0.026 | S | 0.205 | 0.258 | 0.090 | 0.067 | 0.078 |

**Table S3.** Representative Rietveld refinement results of the Ag<sub>2</sub>S:Y nanocrystals from Materials Studio and POWDERCELL softwares.

| Phase | Pressure<br>(GPa) | Space<br>group                                | Cell parameter       |                      |                      |                 | Position parameter |       |       | Refinement agreement |                |                 |
|-------|-------------------|-----------------------------------------------|----------------------|----------------------|----------------------|-----------------|--------------------|-------|-------|----------------------|----------------|-----------------|
|       |                   |                                               | a (Å)<br>uncertainty | b (Å)<br>uncertainty | c (Å)<br>uncertainty | $\beta$ (°)     | Atom               | x     | y     | z                    | R <sub>p</sub> | R <sub>wp</sub> |
| I     | 0                 | P21/n                                         | 4.213<br>0.001       | 6.904<br>0.001       | 7.839<br>0.001       | 99.639<br>0.014 | S                  | 0.363 | 0.254 | 0.121                | 0.071          | 0.090           |
| I     | 1.23              | P21/n                                         | 4.188<br>0.001       | 6.820<br>0.001       | 7.872<br>0.001       | 99.548<br>0.010 | S                  | 0.337 | 0.232 | 0.138                | 0.055          | 0.121           |
| I     | 5.90              | P21/n                                         | 4.158<br>0.002       | 6.562<br>0.002       | 7.719<br>0.001       | 99.125<br>0.015 | S                  | 0.318 | 0.202 | 0.127                | 0.087          | 0.105           |
| II    | 5.90              | P2 <sub>1</sub> 2 <sub>1</sub> 2 <sub>1</sub> | 6.525<br>0.001       | 4.220<br>0.001       | 7.318<br>0.002       | -               | S                  | 0.246 | 0.133 | 0.159                | 0.087          | 0.105           |

|     |       |                                               |       |       |       |        |   |       |       |       |       |       |       |
|-----|-------|-----------------------------------------------|-------|-------|-------|--------|---|-------|-------|-------|-------|-------|-------|
|     |       |                                               |       |       |       |        | S | 0.251 | 0.109 | 0.143 |       |       |       |
| II  | 9.00  | P2 <sub>1</sub> 2 <sub>1</sub> 2 <sub>1</sub> | 6.612 | 4.106 | 7.263 |        | - | Ag1   | 0.024 | 0.225 | 0.432 | 0.071 | 0.092 |
|     |       |                                               | 0.001 | 0.003 | 0.001 |        |   | Ag2   | 0.158 | 0.425 | 0.823 |       |       |
| III | 9.00  | P21/n                                         | 4.241 | 5.827 | 7.883 | 94.989 |   | S     | 0.224 | 0.232 | 0.095 |       |       |
|     |       |                                               | 0.001 | 0.001 | 0.001 | 0.015  |   | Ag1   | 0.728 | 0.006 | 0.290 | 0.071 | 0.092 |
|     |       |                                               |       |       |       |        |   | Ag2   | 0.256 | 0.316 | 0.451 |       |       |
| III | 17.08 | P21/n                                         | 4.114 | 5.718 | 7.965 | 93.012 |   | S     | 0.223 | 0.268 | 0.105 |       |       |
|     |       |                                               | 0.004 | 0.000 | 0.004 | 0.037  |   | Ag1   | 0.736 | 0.033 | 0.287 | 0.050 | 0.074 |
|     |       |                                               |       |       |       |        |   | Ag2   | 0.255 | 0.298 | 0.429 |       |       |

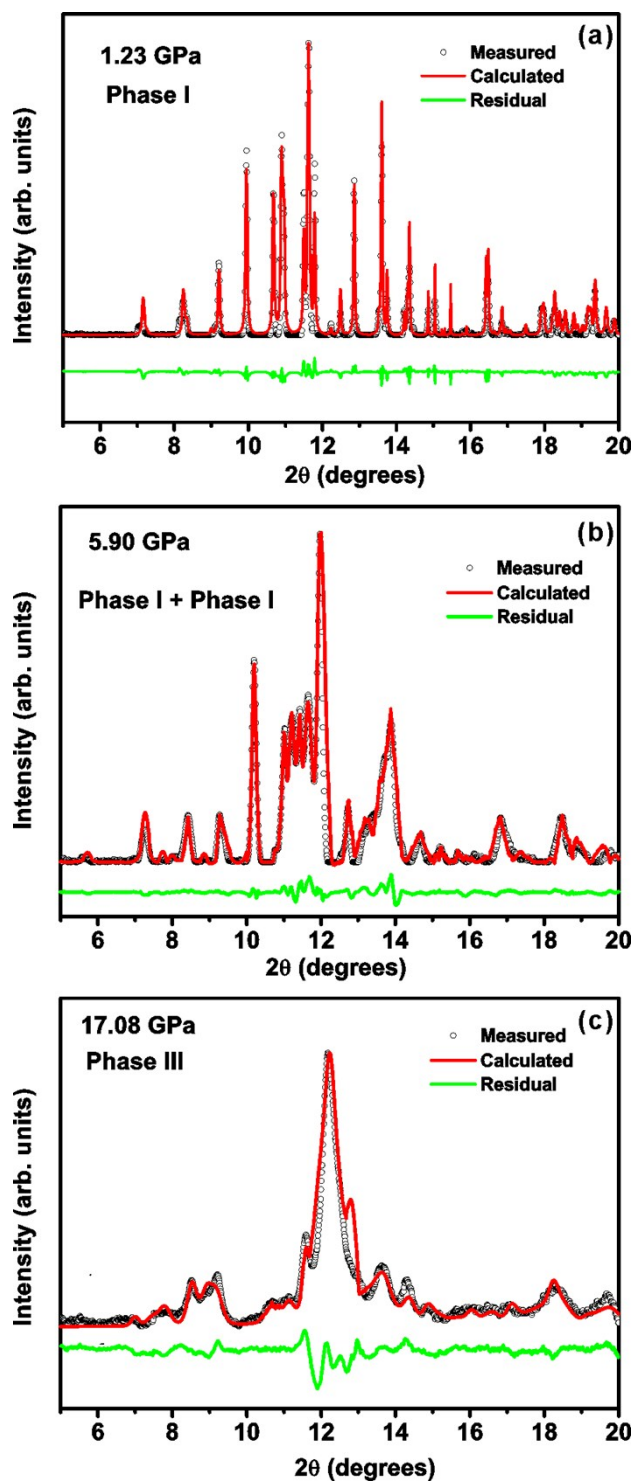

**Fig. S2** Rietveld refinements at (a) 1.23 GPa, phase I, (b) 5.90 GPa, phase I + phase II, (c) 17.08 GPa, phase III for  $\text{Ag}_2\text{S}:\text{Y}$  samples.

### 3. The evolution of normalized cell parameters for three phases

The evolution of normalized cell parameters (Fig. S3) for the three phases of the pure  $\text{Ag}_2\text{S}$  sample are investigated to reveal the phase transformation route. During the initial compression,

the contraction of the lattice parameters is rather anisotropic and the b axis is the most compressible of the lattice constants, as indicated in the obtained evolution for the normalized cell parameters of the phase I (Fig. S3a). In phase II, it can be seen that a and b axes are less compressible in Fig. S3b. As can be seen in Fig. S3c, in phase III, the b axis is the most compressible of the lattice constants and the c axis is almost incompressible.

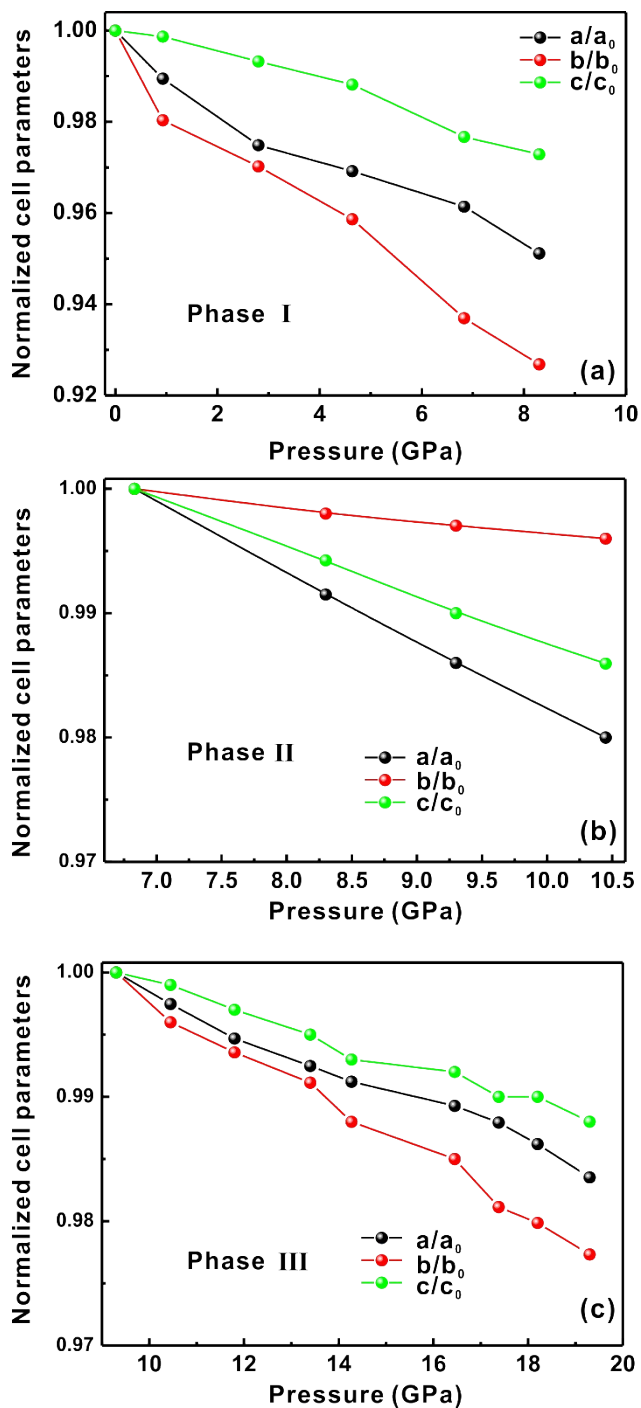

**Fig. S3** Normalized cell parameters  $a/a_0$ ,  $b/b_0$ ,  $c/c_0$  as a function of pressure for (a) phase I, (b) phase II, and (c) phase III of the pure Ag<sub>2</sub>S nanocrystals.

## References

1. X. Yang, H. T. Xue, J. Xu, X. Huang, J. Zhang, Y.-B. Tang, T.-W. Ng, H.-L. Kwong, X.-M. Meng and C.-S. Lee, *ACS Appl Mater Interfaces*, 2014, **6**, 9078-9084.
2. I. Gonzalo-Juan, J. A. Escibano, Y. Castro, A. J. Sanchez-Herencia, J. L. G. Fierro and B. Ferrari, *Green Chem.*, 2014, **16**, 3286-3296.
3. W. Jiang, Z. M. Wu, X. N. Yue, S. J. Yuan, H. F. Lu and B. Liang, *RSC Adv.*, 2015, **5**, 24064-24071.
